# Supplementary material for: Heterogeneous structured tough conductive gel fibres for stable and high-performance wearable strain sensors
Source: Royal Society of Chemistry journal article supplement (doi:10.1039/d1ta02422a), 2021-01-01
Supplement: d1ta02422a2.pdf [file d1ta02422a2.pdf]

## Supporting Information

# Heterogeneous Structured Tough Conductive Gel Fibers for Stable and High-Performance Wearable Strain Sensors

*Tao Chen, Peiling Wei\*, Guoyin Chen, Hongmei Liu, Innocent T. Mugaanire, Kai Hou\* and Meifang Zhu\**

State Key Laboratory for Modification of Chemical Fibers and Polymer Materials, College of Materials Science and Engineering, Donghua University, Shanghai, 201620, China

### **Characterizations:**

The rheological measurements were performed on MCR 302 rheometer (Anton Paar, Germany). The diameter of parallel plate is 25 mm. Dynamic time sweep measurements carried on 30 minutes at 22 °C, with oscillatory deformation of amplitude set at 1% and the angular frequency set at 6.28 rad/s.

The cytocompatibility of gel fibers was tested with L929 cells. The cell culture media were supplemented with 10% FBS and 1% streptomycin/penicillin. In detail, freeze-dried gel fibers were ground into powders, then dispersed in DMEM to form solutions with a concentration of 0.6 mg/ml. Such gel fibers dispersions were sterilized by filtration (220  $\mu\text{m}$ , Thermo Scientific) before the test. L929 cells were seeded on the 96-well plates (2000

cells/well) with growth media of DMEM and 100  $\mu$ L of above gel fibers solutions were added in sample group, while 100  $\mu$ L of DMEM was added in the control group. Afterwards, the 96-well plate were placed in a humidified incubator (with 5% CO<sub>2</sub>) at 37°C for 1 day and 3 days of cultivation, respectively. Then, the cell viability was measured by CCK-8 assay. Briefly, the growth media in each well of the plates was refreshed by new media with addition of 10  $\mu$ L of CCK-8 solution. L929 cells were incubated for another 1 h. Then, the living cell concentration in each well of the plates was finally quantified using a microplate reader (Thermo Scientific) by measuring the optical absorbance at 450 nm. Live/dead reagent (Ethidium homodimer-1 (0.5  $\mu$ M) and Calcein AM (0.25  $\mu$ M)) (Molecular Probes) were pipetted to the 96-well plated for 45 min. Subsequently, cell viability of corresponding gel fibers and the control group was observed on an inverted fluorescence microscope (DMI8, Leica) equipped with a CCD camera.

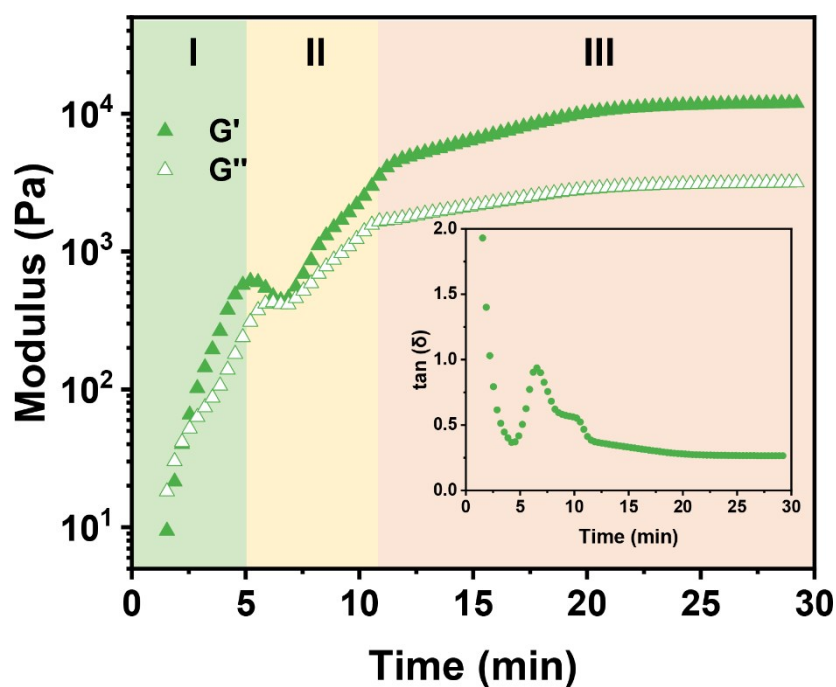

**Fig. S1.** Time-dependent modulus ( $G'$  and  $G''$ ) and loss factor ( $\tan(\delta)$ ) for gelation process of precursor solution about PMON nanocomposite gel. (I: polymerization period in mold; II: extrusion period with post-stretching process; III: fiber forming period with continuous polymerization)

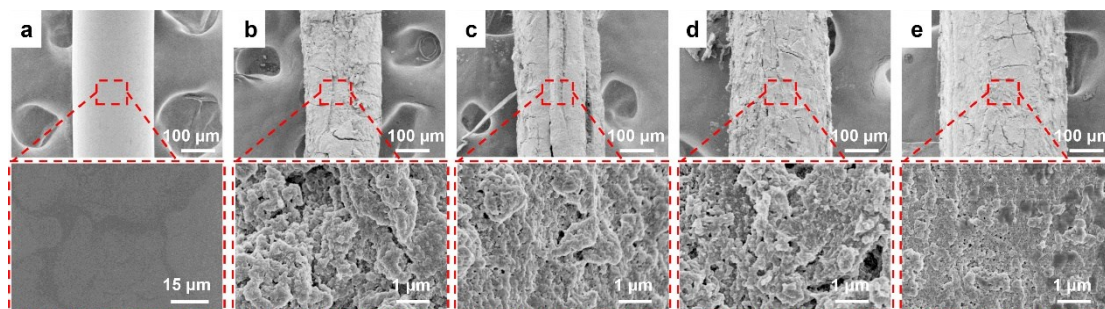

**Fig. S2.** SEM images of (a) PMON gel fiber, (b) PANI-2/PMON, (c) PANI-4/PMON, (d) PANI-6/PMON and (e) PANI-8/PMON hybrid gel fibers.

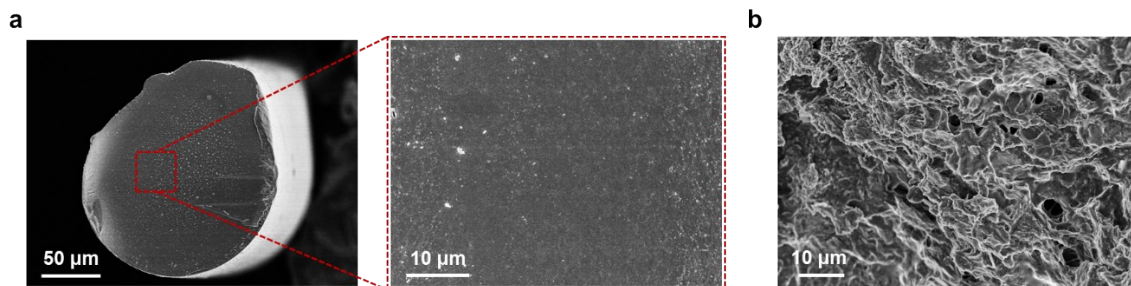

**Fig. S3.** Cross-sectional image of (a) PMON gel fibre and (b) PANI-6/PMON hybrid gel fibre

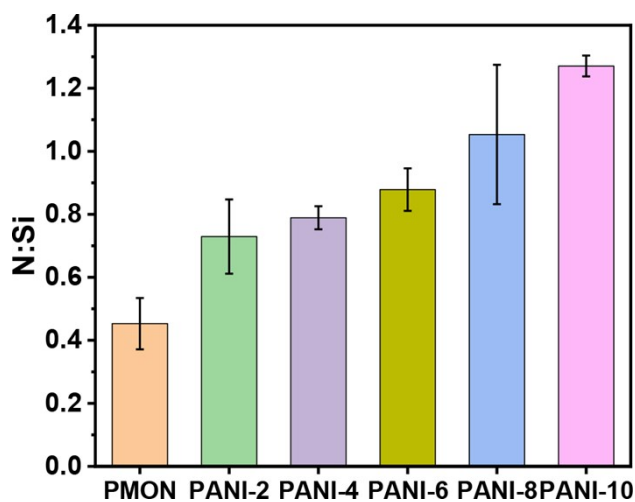

**Fig. S4.** Calculated atomic ratio of nitrogen (N) to silicon (Si) from EDS of PMON and PANI-n/PMON gel fibers.

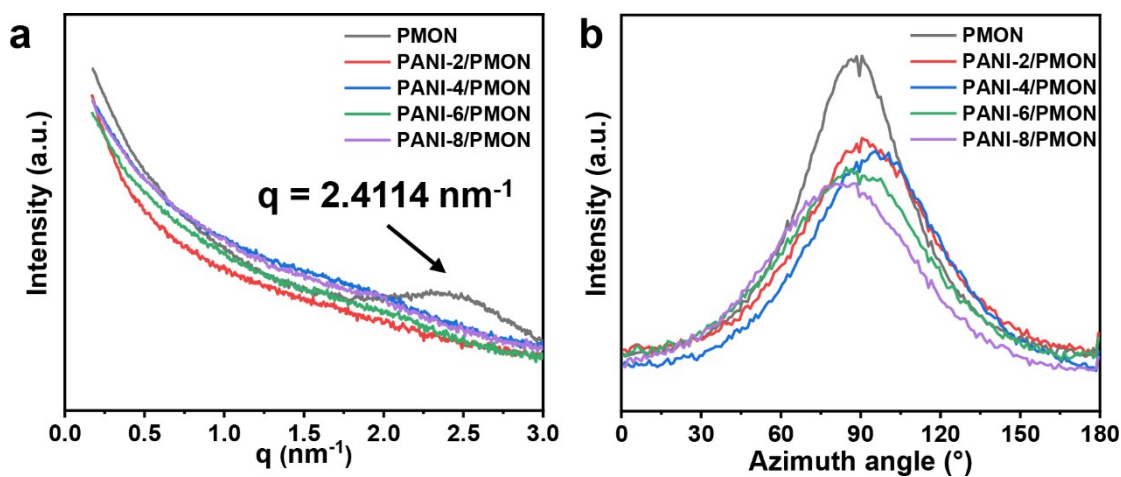

**Fig. S5.** Microstructural characterization of gel fibers: (a) SAXS profiles and (b) corresponding azimuth integral of the PMON gel fiber and PANI-n/PMON hybrid gel fibers.

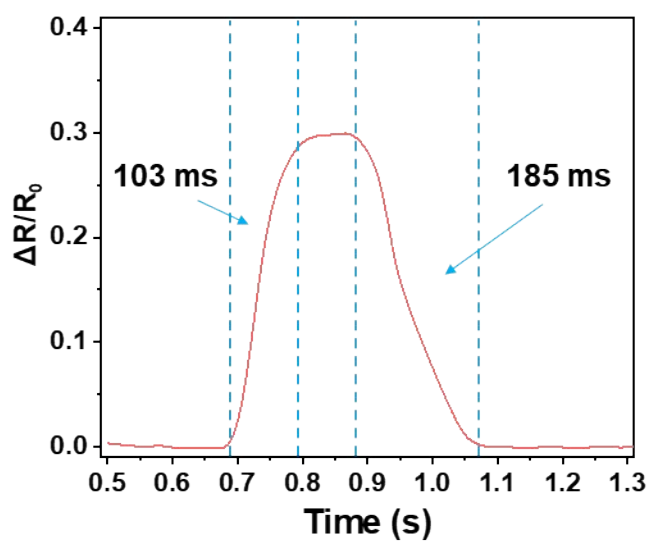

**Fig. S6.** The response time of the PANI-6/PMON hybrid gel fibre strain sensor.

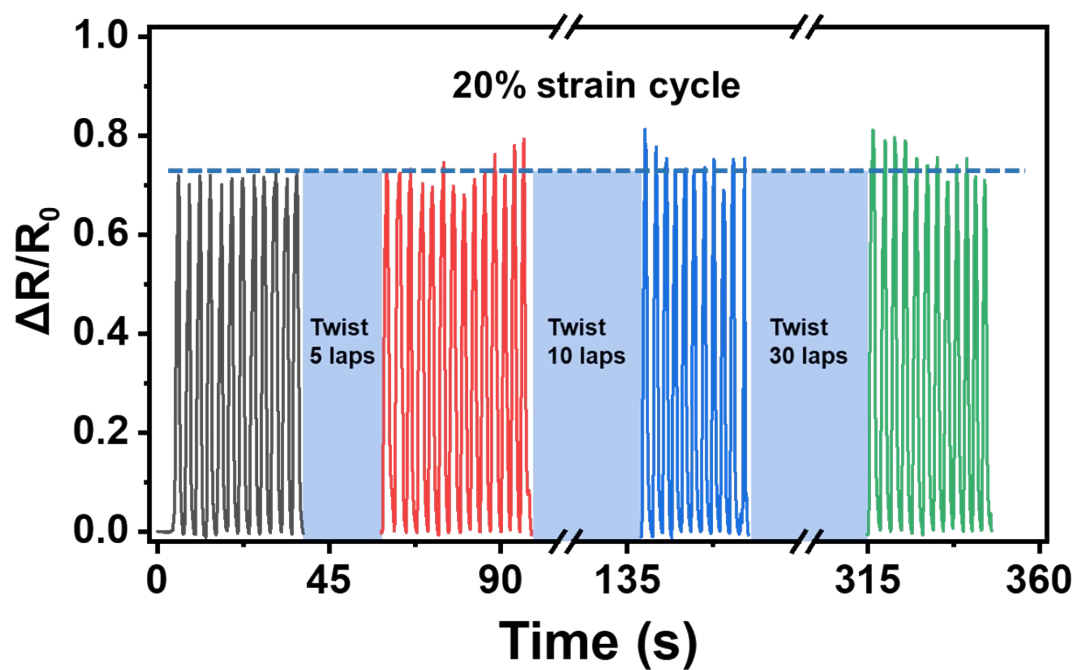

**Fig. S7.** Real-time relative resistance variation of the 10 cm long hybrid gel fibre with and without twisting under same 20% strain.

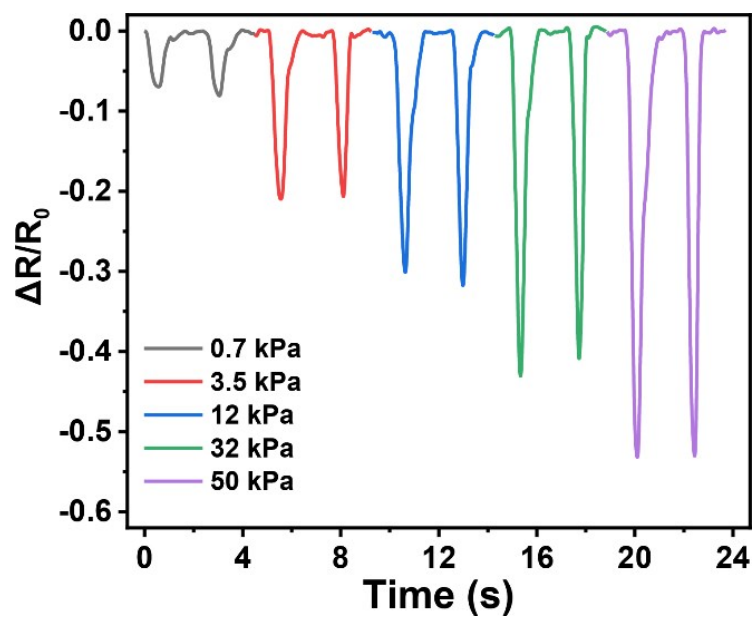

**Fig. S8.** Real-time relative resistance variation of the hybrid gel fibre under diverse Pressures

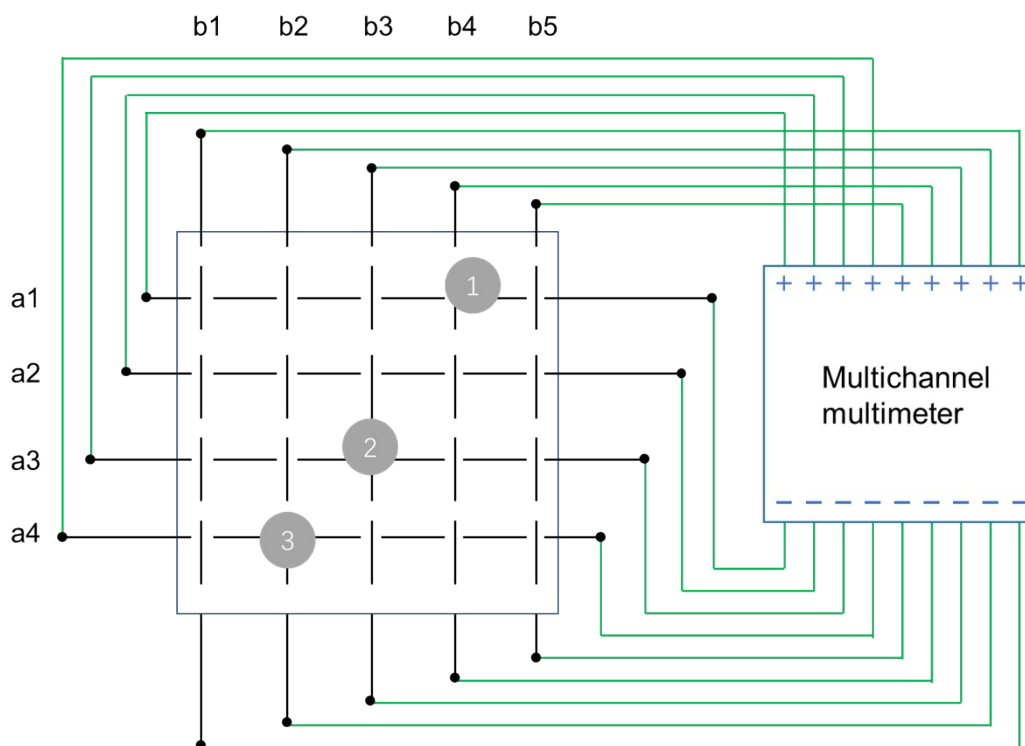

**Fig. S9.** Equivalent circuit diagram of sensing array and the three locations where the 50g weight is placed (black lines and green lines represent hybrid gel fibres and copper wires respectively).

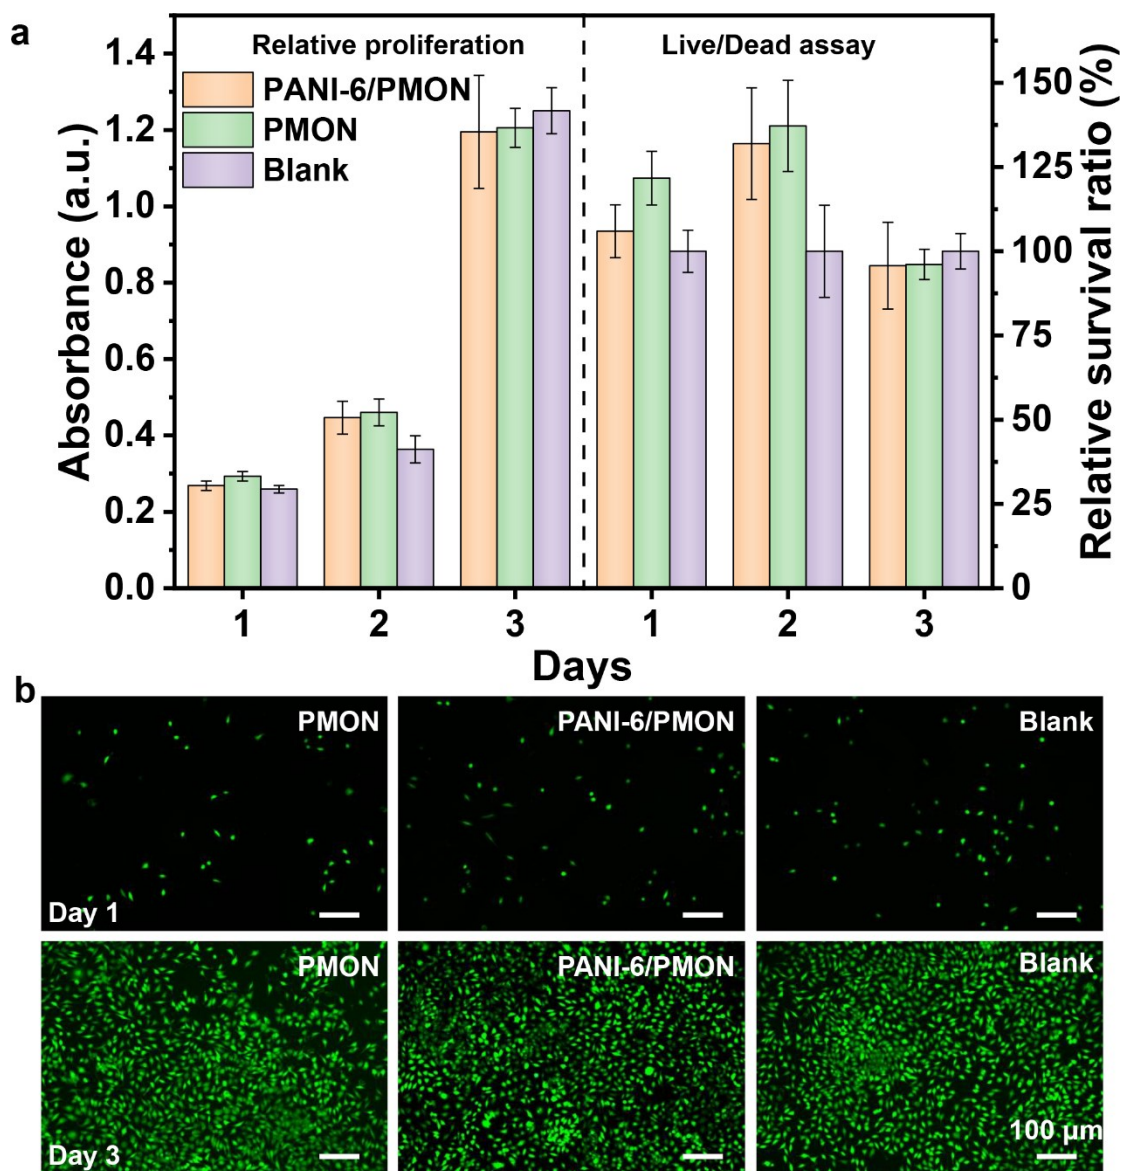

**Fig. S10.** (a) Relative proliferation and live/dead assay of L929 cells on PMON gel fiber and (b) cell fluorescence micrograph of PANI-6/PMON hybrid gel fiber compared to blank at 1 and 3 days, where live cells are in green, dead cells in red.
